# Supplementary material
Source: publisher figshare collection journal article supplement (https://acs.figshare.com/ndownloader/files/13889804)
Supplement: Supplementary file 1 [file 13889804]

## Sheet: Sheet1
Supplementary Table 6. PKN3 Phospho Motif Densitometry Inputs
Values were generated from two replicate PKN3 phospho motif arrays and used for scoring potential PKN3 substrate sites.
	P	G	A	C	S	T	V	I	L	M	F	Y	W	H	K	R	Q	N	D	E	pT	pY
-5	0.134402	0.000483136	-0.0374383	0.771588	0.089479	0.089479	-0.193271	-0.306452	0.767353	-0.421758	-0.25279	-0.252512	-0.0381159	-0.0109607	-0.518472	-0.00352855	-0.323125	-0.36049	0.384584	0.164122	-0.876089	-0.257081
-4	0.616542	0.467122	0.266208	0.340425	0.369939	0.369939	-0.398541	-0.81027	-0.232403	-0.255846	-0.445754	-0.0917864	-0.4031	-0.234809	-0.0547494	0.232994	0.129685	0.105233	-0.231408	0.215542	-0.772668	-0.108905
-3	0.934875	-0.0565988	-0.188106	0.167563	0.126222	0.126222	-0.919828	-1.39241	-0.737296	-0.803566	-0.795372	-0.217591	-0.67358	0.0302573	0.344805	1.73577	0.234511	-0.0107767	-0.588715	-0.510107	-0.821452	-0.343055
-2	0.355203	0.554161	0.25654	0.180831	0.549369	0.549369	-0.815664	-1.02762	-0.693607	-0.607327	-0.594396	-0.538594	-0.608945	0.44555	0.224262	0.475718	0.551482	0.382273	-0.555842	-0.328503	-1.03366	-0.395811
-1	2.16231	0.109782	-0.239282	-0.56555	-0.397003	-0.397003	-1.29843	-1.62734	-0.528899	-0.554106	-1.1354	-0.516394	-1.09556	-0.158945	0.22667	-0.595078	0.650847	0.621915	0.201858	0.495126	-0.942782	-0.589692
1	-0.252358	-0.790176	-0.588922	0.248787	0.145187	0.145187	-0.617894	0.153855	0.157485	0.800967	1.70494	-0.234143	-0.64517	-0.583544	-0.692597	-0.873699	0.279034	-0.182414	-0.769687	-0.721358	-0.317683	-0.0781351
2	-0.744677	-0.77919	-0.235021	0.241441	0.162607	0.162607	-0.646734	-0.644707	0.0202201	-0.331489	-0.67013	-0.050638	-0.502442	0.535409	0.316273	1.18659	-0.0139351	0.154524	-0.919008	-0.816045	-0.489194	-0.045094
3	-0.447994	0.259357	-0.184476	0.773261	-0.358842	-0.358842	-0.280512	-0.230069	0.041757	-0.219377	-0.167442	0.489397	0.422502	0.339921	-0.151135	-0.524381	0.205858	0.0840625	-0.174105	0.0970841	-0.524104	-0.325828
4	0.68885	0.242725	0.385582	0.470001	-0.0368195	-0.0368195	-0.361875	-0.341407	-0.213774	-0.324344	-0.540308	-0.344336	-0.681039	0.567403	0.258851	-0.712954	0.385744	0.322678	-0.218504	-0.040645	-0.203627	-0.152033
